# Supplementary material for: Self-management of long COVID symptoms with over-the-counter medicines and other non-prescribed therapies: a cross-sectional survey
Source: Research Square preprint supplement (doi:10.21203/rs.3.rs-8139408/v1), 2025-12-01
Supplement: Supplementary file 1 [file 3c682b37bc9de0094498ea10.docx]

**Additional file 1 Survey Questionnaire**

## **Survey of non-prescribed medicines, supplements, remedies and other therapies for Long COVID**

*Memorable ID number*

Please create a memorable ID number made up of:

- The last 3 digits of your telephone number (e.g. 707)
- The numerical parts of your postcode (e.g. 461)

Your final ID number should have 5 or 6 numbers (e.g. 707461)

_____________________

Please write down this number for your records.

### Section 1: Information about you

1. **What is your age?**
   1. 18-25 years
   2. 26-35 years
   3. 36-45 years
   4. 46-55 years
   5. 56-65 years
   6. 66-75 years
   7. 76-85 years
   8. 86-95 years
   9. ≥95 years
   10. Prefer not to say
2. **Are you?**
   1. Male
   2. Female
   3. Non-binary
   4. Prefer not to say
3. **What is your ethnicity?**
   1. White
   2. Asian/Asian British
   3. Black/African/Caribbean/Black British
   4. Mixed/Multiple ethnic group
   5. Other, please specify
   6. Prefer not to say
4. **Where do you live?**
   1. North East
   2. North West
   3. Yorkshire and the Humber
   4. West Midlands
   5. East Midlands
   6. South West
   7. South East
   8. East of England
   9. Greater London
   10. Scotland
   11. Northern Ireland
   12. Wales
   13. Prefer not to say
5. **What is your current employment status? (Select all that apply)**
   1. Employed – full time
   2. Employed – part time
   3. Employed but currently not working; for example sick leave
   4. Unemployed
   5. Furloughed
   6. Voluntary work
   7. In full time education
   8. Retired
   9. Prefer not to say
   10. Other, please specify: __________________
6. **How long have you had COVID symptoms?**
7. 3-4 months
8. 5-6 months
9. 7-8 months
10. 9-10 months
11. 11-12 months
12. Over 12 months

### Section 2: Managing Long COVID symptoms

The following questions will ask about use of non-prescribed over-the-counter medications and other therapies to manage Long COVID symptoms. Please note, we do NOT endorse the use of any of the medicines or therapies listed for the management of Long COVID.

**Don’t worry if you can’t remember all the medicines, supplements, remedies and other therapies you have tried, any information is helpful.**

Non-prescribed medicines, supplements and remedies

**Have you used any of the following non-prescribed medicines, supplements or remedies to help manage your Long COVID symptoms?**

**A) Painkillers**

|  | Yes (tick box) | How much did you take each time? (i.e. how many tablets, sprays, applications) | How many times a week did you take this medication? | How long have you used this medication for? (days/ weeks/ months) | Have you taken this in the last week? |
| --- | --- | --- | --- | --- | --- |
| Paracetamol |  |  |  |  |  |
| Ibuprofen (200mg) |  |  |  |  |  |
| Ibuprofen (400mg) |  |  |  |  |  |
| Co-codamol |  |  |  |  |  |
| Paramol (dihydrocodeine + Paracetamol) |  |  |  |  |  |
| Aspirin (75mg) |  |  |  |  |  |
| Aspirin (300mg) |  |  |  |  |  |
| Any other painkiller medicine, please specify |  |  |  |  |  |

**B) Cough medicines**

|  | Yes (tick box) | How much did you take each time? (i.e. how many tablets, sprays, applications) | How many times a week did you take this medication? | How long have you used this medication for? (days/ weeks/ months) | Have you taken this in the last week? |
| --- | --- | --- | --- | --- | --- |
| Codeine Cough Mixture |  |  |  |  |  |
| Dry Cough Mixture (e.g. Pholcodine, Ambroxol) |  |  |  |  |  |
| Chesty Cough Mixture (e.g. Guaifenesin) |  |  |  |  |  |
| Any other Cough and cold medicine, please specify |  |  |  |  |  |

**C) Antacids and anti-diarrhoea medicines**

|  | Yes (tick box) | How much did you take each time? (i.e. how many tablets, sprays, applications) | How many times a week did you take this medication? | How long have you used this medication for? (days/ weeks/ months) | Have you taken this in the last week? |
| --- | --- | --- | --- | --- | --- |
| Gaviscon (tablets, liquid) |  |  |  |  |  |
| Loperamide (Imodium) |  |  |  |  |  |
| Rennie |  |  |  |  |  |
| Any other antacids and anti-diarrhoea medicines, please specify |  |  |  |  |  |

**D) Decongestants**

|  | Yes (tick box) | How much did you take each time? (i.e. how many tablets, sprays, applications) | How many times a week did you take this medication? | How long have you used this medication for? (days/ weeks/ months) | Have you taken this in the last week? |
| --- | --- | --- | --- | --- | --- |
| Pseudoephedrine |  |  |  |  |  |
| Decongestant Nasal Spray (e.g. Otrivine) |  |  |  |  |  |
| Steroid nasal spray (e.g. Beconase, Pirinase) |  |  |  |  |  |
| Any other decongestant, please specify |  |  |  |  |  |

**E) Vitamins, minerals and herbal remedies**

|  | Yes (tick box) | How much did you take each time? (i.e. how many tablets, sprays, applications) | How many times a week did you take this medication? | How long have you used this medication for? (days/ weeks/ months) | Have you taken this in the last week? |
| --- | --- | --- | --- | --- | --- |
| Vitamin D |  |  |  |  |  |
| Vitamin B |  |  |  |  |  |
| Vitamin C |  |  |  |  |  |
| Coenzyme Q10 (CoQ10) |  |  |  |  |  |
| Zinc |  |  |  |  |  |
| Curcumin or Turmeric |  |  |  |  |  |
| Garlic |  |  |  |  |  |
| Ginger |  |  |  |  |  |
| Cumin |  |  |  |  |  |
| Echinacea |  |  |  |  |  |
| Magnesium |  |  |  |  |  |
| Multivitamin preparation |  |  |  |  |  |
| Traditional medicine, please specify |  |  |  |  |  |
| Other vitamin, mineral or herbal supplements, please specify |  |  |  |  |  |

**F) Antihistamines**

|  | Yes (tick box) | How much did you take each time? (i.e. how many tablets, sprays, applications) | How many times a week did you take this medication? | How long have you used this medication for? (days/ weeks/ months) | Have you taken this in the last week? |
| --- | --- | --- | --- | --- | --- |
| Loratadine (Claritin) |  |  |  |  |  |
| Cetirizine |  |  |  |  |  |
| Chlorphenamine (Piriton) |  |  |  |  |  |
| Acrivastatine (Benadryl) |  |  |  |  |  |
| Promethazine (Phenergan) |  |  |  |  |  |
| Other antihistamine, please specify |  |  |  |  |  |

**G) Sleep medicines**

|  | Yes (tick box) | How much did you take each time? (i.e. how many tablets, sprays, applications) | How many times a week did you take this medication? | How long have you used this medication for? (days/ weeks/ months) | Have you taken this in the last week? |
| --- | --- | --- | --- | --- | --- |
| Melatonin |  |  |  |  |  |
| Other sleep medicines, please specify |  |  |  |  |  |

**H) Illicit drug**

|  | Yes (tick box) | How much did you take each time? (i.e. how many tablets, sprays, applications) | How many times a week did you take this medication? | How long have you used this medication for? (days/ weeks/ months) | Have you taken this in the last week? |
| --- | --- | --- | --- | --- | --- |
| Cannabis |  |  |  |  |  |
| Cocaine |  |  |  |  |  |
| Amphetamine |  |  |  |  |  |
| CBD oil |  |  |  |  |  |
| Other illicit drug, please specify |  |  |  |  |  |

**I) Other**

|  | Yes (tick box) | How much did you take each time? (i.e. how many tablets, sprays, applications) | How many times a week did you take this medication? | How long have you used this medication for? (days/ weeks/ months) | Have you taken this in the last week? |
| --- | --- | --- | --- | --- | --- |
| Other, please specify |  |  |  |  |  |

Any comments?

**Where did you get your medicines, supplements or remedies from? (tick all that apply)**

1. Pharmacy – in person
2. Pharmacy – online
3. Highstreet shop, e.g. Holland & Barrett
4. Another country e.g. couriered, brought back from trip or brought back by family/ friend
5. Online, please specify

**What influenced your decision to use non-prescribed medicines, supplements or remedies to manage your Long COVID symptoms?**

1. Friends or family members
2. Pharmacist
3. Doctor
4. Nurse or allied health professional (e.g. physio)
5. NHS website
6. Other websites, please specify
7. Online Long COVID support group, please specify
8. Face-to-face Long-COVID support group, please specify
9. Social media (***not*** Long COVID support group)
   1. Twitter
   2. Facebook
   3. Tiktok
   4. Instagram
   5. Other, please specify
10. Previous experience of similar symptoms
11. Other, please specify

Any comments?

**Changes to your diet**

**Have you made any of the following changes to your diet to help manage long COVID symptoms?**

- Gluten free
- Foods low in histamines e.g. avocadoes
- Alcohol free
- Dairy free
- Fasting
- Other, please specify

Any comments?

**What influenced your decision to change your diet to manage your Long COVID symptoms?**

1. Friends or family members
2. Pharmacist
3. Doctor
4. Nurse or allied health professional (e.g. physio)
5. NHS website
6. Other websites, please specify
7. Online Long COVID support group, please specify
8. Face-to-face Long-COVID support, please specify
9. Social media (***not*** Long COVID support group)
   1. Twitter group
   2. Facebook
   3. Tiktok
   4. Instagram
   5. Other, please specify
10. Previous experience of similar symptoms
11. Other, please specify

Any comments?

**Other therapies**

**Have you used any of the following therapies to help manage your Long COVID symptoms?**

|  | **Yes** | **NHS/paid for/free** | **How many sessions have you had?** |
| --- | --- | --- | --- |
| Physiotherapy |  |  |  |
| Acupuncture |  |  |  |
| Aromatherapy |  |  |  |
| Homeopathy |  |  |  |
| Massage therapy |  |  |  |
| Osteopathy |  |  |  |
| Chiropractic |  |  |  |
| Reflexology |  |  |  |
| Hyperbaric oxygen therapy |  |  |  |
| Hypnotherapy |  |  |  |
| Meditation/mindfulness |  |  |  |
| Magnet therapy |  |  |  |
| Yoga |  |  |  |
| Breathwork |  |  |  |
| Counselling |  |  |  |
| Other, please specify |  |  |  |
| None |  |  |  |

Any comments

**What influenced your decision to use these therapies to manage your Long COVID symptoms?**

1. Friends or family members
2. Pharmacist
3. Doctor
4. Nurse or allied health professional (e.g. physio)
5. NHS website
6. Other websites, please specify
7. Online Long COVID support group, please specify
8. Face-to-face Long-COVID support group, please specify
9. Social media (***not*** Long COVID support group)
   1. Twitter
   2. Facebook
   3. Tiktok
   4. Instagram
   5. Other, please specify
10. Previous experience of similar symptoms
11. Other, please specify

Any comments

### Section 3: Long COVID symptoms

**Which Long COVID symptoms were you trying to manage with non-prescribed medicines, supplements, remedies or other therapies?**

1. Fatigue (tiredness)
2. Chest pain
3. Joint pain
4. Muscle pain
5. Headache
6. Cough
7. Shortness of breath
8. Diarrhoea
9. Altered taste
10. Altered smell
11. Depression
12. Anxiety
13. Feeling faint
14. Dizziness
15. Brain fog
16. Difficulty concentrating
17. Coordination difficulties
18. Insomnia - lack of sleep
19. Excessive sleeping
20. Ear/hearing issues
21. Hair loss
22. Eye/vision issues
23. Reproductive or sexual health issues
24. Other, please specify

Any comments?

### Section 4: Comments

**Do you have any other comments about using non-prescribed medicines, supplements, remedies or other therapies to manage your Long COVID symptoms?**
