# Supplementary material for: Self-management of long COVID symptoms with over-the-counter medicines and other non-prescribed therapies: a cross-sectional survey
Source: Research Square preprint supplement (doi:10.21203/rs.3.rs-8139408/v1), 2025-12-01
Supplement: Supplementary file 2 [file 5ba8243174379a5e45647f4c.docx]

**Additional file 2 Results Tables**

### **Table S1 Participant characteristics: Region (n=193)**

|  | **Number (percentage)** |
| --- | --- |
| **Region** |  |
| North East | 3 (1.6) |
| North West | 17 (8.8) |
| Yorkshire and the Humber | 17 (8.8) |
| West Midlands | 19 (9.8) |
| East Midlands | 13 (6.7) |
| South West | 17 (8.8) |
| South East | 31 (16.1) |
| East of England | 10 (5.2) |
| Greater London | 24 (12.4) |
| Scotland | 24 (12.4) |
| Northern Ireland | 9 (4.7) |
| Wales | 7 (3.6) |
| Prefer not to say | 2 (1.0) |

### **Table S2 Medication overuse**

| **Medication overuse** (Did the person report taking above the recommended dose) | Number (percentage) |
| --- | --- |
| Yes | 81 (42.0) |
| No | 112 (58.0) |
| Total number of respondents | 193 |
| **Medication overuse excluding vitamins** (Did the person report taking above the recommended dose) |  |
| Yes | 39 (20.2) |
| No | 154 (79.8) |
| Total number of respondents | 193 |

### **Table S3 Alternative therapies used**

| **Alternative therapies used** | **Number (percentage)** |
| --- | --- |
| Physiotherapy | 57 (33.9) |
| Meditation/Mindfulness | 56 (33.3) |
| Breathwork | 55 (32.7) |
| Counselling | 48 (28.6) |
| Yoga | 41 (24.4) |
| Other therapies | 28 (16.7) |
| Acupuncture | 24 (14.3) |
| Massage therapy | 20 (11.9) |
| Hyperbaric | 19 (11.3) |
| Osteopathy | 11 (6.6) |
| Reflexology | 10 (6.0) |
| Chiropractic | 4 (2.4) |
| Hypnotherapy | 2 (1.2) |
| Aromatherapy | 2 (1.2) |
| Homeopathy | 1 (0.6) |
| Magnet therapy | 1 (0.6) |
| Total number of respondents | 168 |

*Notes:* Some participants used multiple types of alternative therapies.

### **Table S4 Costs of alternative therapies**

| **Alternative therapies used** | **Number (percentage) of participants having out-of-expenditure expenditure** | **Range of out-of-pocket expenditure per session (£)** |
| --- | --- | --- |
| Physiotherapy | 11 (8.9) | 20-55 |
| Acupuncture | 22 (17.7) | 25-85 |
| Aromatherapy | 1 (0.8) | 45-45 |
| Homeopathy | 1 (0.8) | 70-70 |
| Massage therapy | 19 (15.3) | 35-100 |
| Osteopathy | 9 (7.3) | 45-150 |
| Chiropractic | 4 (3.2) | 40-120 |
| Reflexology | 10 (8.1) | 20-50 |
| Hyperbaric oxygen therapy | 18 (14.5) | 10-300 |
| Hypnotherapy | 1 (0.8) | 75-75 |
| Meditation/mindfulness | 8 (6.5) | 0-75 |
| Magnet therapy | 1 (0.8) | 70-70 |
| Yoga | 20 (16.1) | 5-100 |
| Breathwork | 9 (7.3) | 0-300 |
| Counselling | 16 (12.9) | 10-150 |
| Other | 15 (12.1) | 12-300 |
| No costs | 48 (38.7) | NA |
| Prefer not to say | 2 (1.6) | NA |

*Notes:* Total number of participants reported accessing alternative therapies for Long COVID management: 124. Total number of participants reported spending their own money on those alternative therapies: 78.

### **Table S5 Social media platforms reported to have influenced self-medication decisions**

| **Social media platforms** | **Number (percentage)** |
| --- | --- |
| Twitter | 33 (76.8) |
| Facebook | 16 (37.2) |
| Tik-Tok | 1 (2.3) |
| Instagram | 5 (11.6) |
| Other | 5 (11.6) |
| Total number of respondents | 43 |

*Notes:* As some respondents use multiple social media platforms, the cumulative percentage exceeds 100%.

### **Table S6 Source of medicines, supplements, and remedies**

| **Sources** | **Number (percentage)** |
| --- | --- |
| Pharmacy - local (in person/delivery) | 107 (64.8) |
| Pharmacy - online | 59 (35.8) |
| Highstreet shop | 83 (50.3) |
| Another country e.g. couriered, brought back from trip or brought back by family/ friend | 23 (13.9) |
| Online other | 55 (33.3) |
| Total number of respondents | 165 |

*Notes:* As some respondents use multiple sources, the cumulative percentage exceeds 100%.

### **Table S7 Dietary changes to manage long COVID symptoms**

| **Dietary Changes** | **Number (percentage)** |
| --- | --- |
| Gluten-Free | 25 (14.8) |
| Food low in histamine (e.g. avocados) | 34 (20.1) |
| Alcohol-free | 73 (43.2) |
| Dairy Free | 25 (14.8) |
| Fasting | 31 (18.3) |
| Other | 39 (23.1) |
| No changes | 59 (34.9) |
| Total number of respondents | 169 |

*Notes:* As some respondents had more than one type of dietary change, the cumulative percentage exceeds 100%.
